# Supplementary material for: Spatial synchronization codes from coupled rate-phase neurons
Source: PubMed Central journal article supplement (PMC6364943; doi:10.1371/journal.pcbi.1006741), 2019-01-25
Supplement: pcbi.1006741.s001.pdf [file pcbi.1006741.s001.pdf]

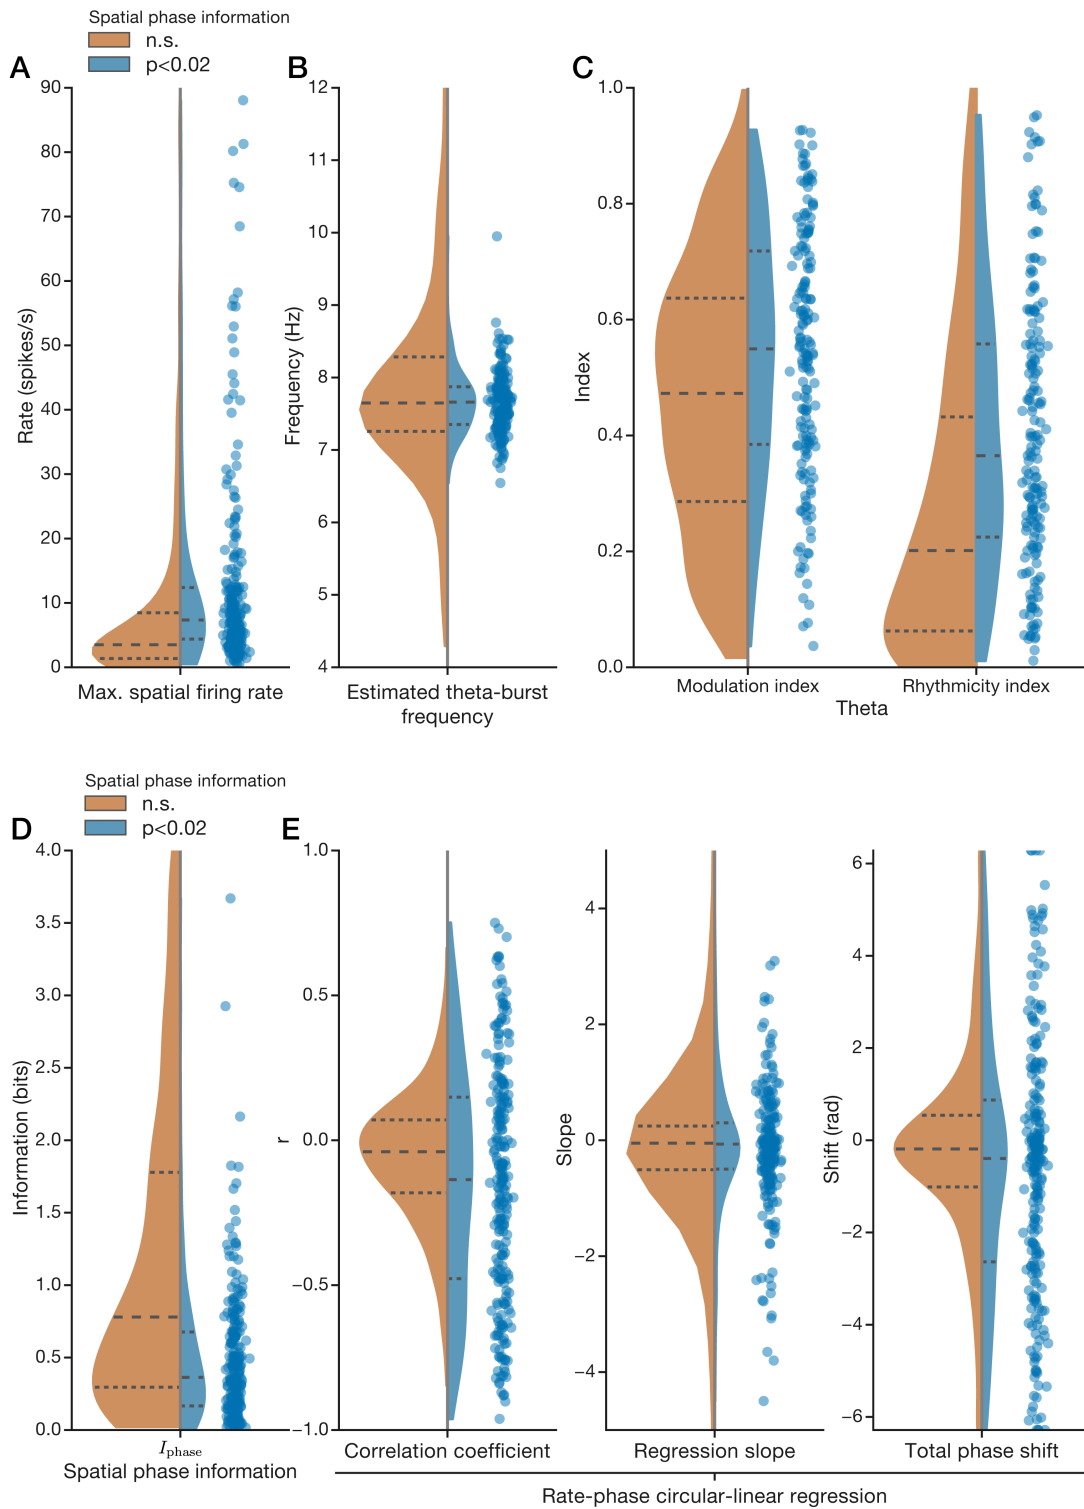

**S1 Fig.** See legend on reverse.

**S1 Fig. Spatial phase-coding cells were theta-modulated and theta-rhythmic.** We show distributions of single-unit recordings with non-significant spatial phase information  $I_{\text{phase}}$  ('non-phase-coding', n.s., orange;  $n = 840$ ) or significant  $I_{\text{phase}}$  ('phase-coding',  $p < 0.02$ , blue;  $n = 233$ ; Methods). Violin plots show Gaussian kernel-density estimates (using Scott's bandwidth rule) normalized by group size for each split; long-dash lines, medians; short-dash lines, 1st/3rd quartiles. (A) Phase-coding recordings had maximal spatial firing rates (median, 7.35 spikes/s) that were distributed higher than non-phase-coding recordings. (B) Autocorrelogram-based estimates of burst frequency (Methods) were similar (median: phase-coding,  $7.66 \text{ s}^{-1}$ ; non-phase-coding, 7.65), but phase-coding recordings were more narrowly distributed (interquartile range: 0.524) than non-phase-coding recordings (1.031). (C) Theta modulation and rhythmicity indices (Methods) show that phase-coding recordings were distributed higher, but this is likely due to the substantial low-rhythmicity subpopulation evident in non-phase-coding recordings. Jittered strip plots show every phase-coding data point. (D+E) Spatial phase-coding cells had broadly distributed rate-phase correlations. (D)  $I_{\text{phase}}$  for phase-coding cells (median, 0.36 bits) was positively skewed across a wide range ([0.012, 3.67] bits). (E) Circular-linear regressions of mean phase onto mean rate based on spatial map pixels. Non-phase-coding recordings were distributed around zero. Correlation coefficient (left) and total phase shift (right; Methods) showed broader distributions for phase-coding than non-phase-coding cells: Compare quartiles (short-dash lines) and fatter tails reflecting excess negative and positive correlations. Total phase shift (right) was computed by rate-normalizing the regression slope (middle).
