# Supplementary material for: Spatial synchronization codes from coupled rate-phase neurons
Source: PubMed Central journal article supplement (PMC6364943; doi:10.1371/journal.pcbi.1006741), 2019-01-25
Supplement: pcbi.1006741.s004.pdf [file pcbi.1006741.s004.pdf]

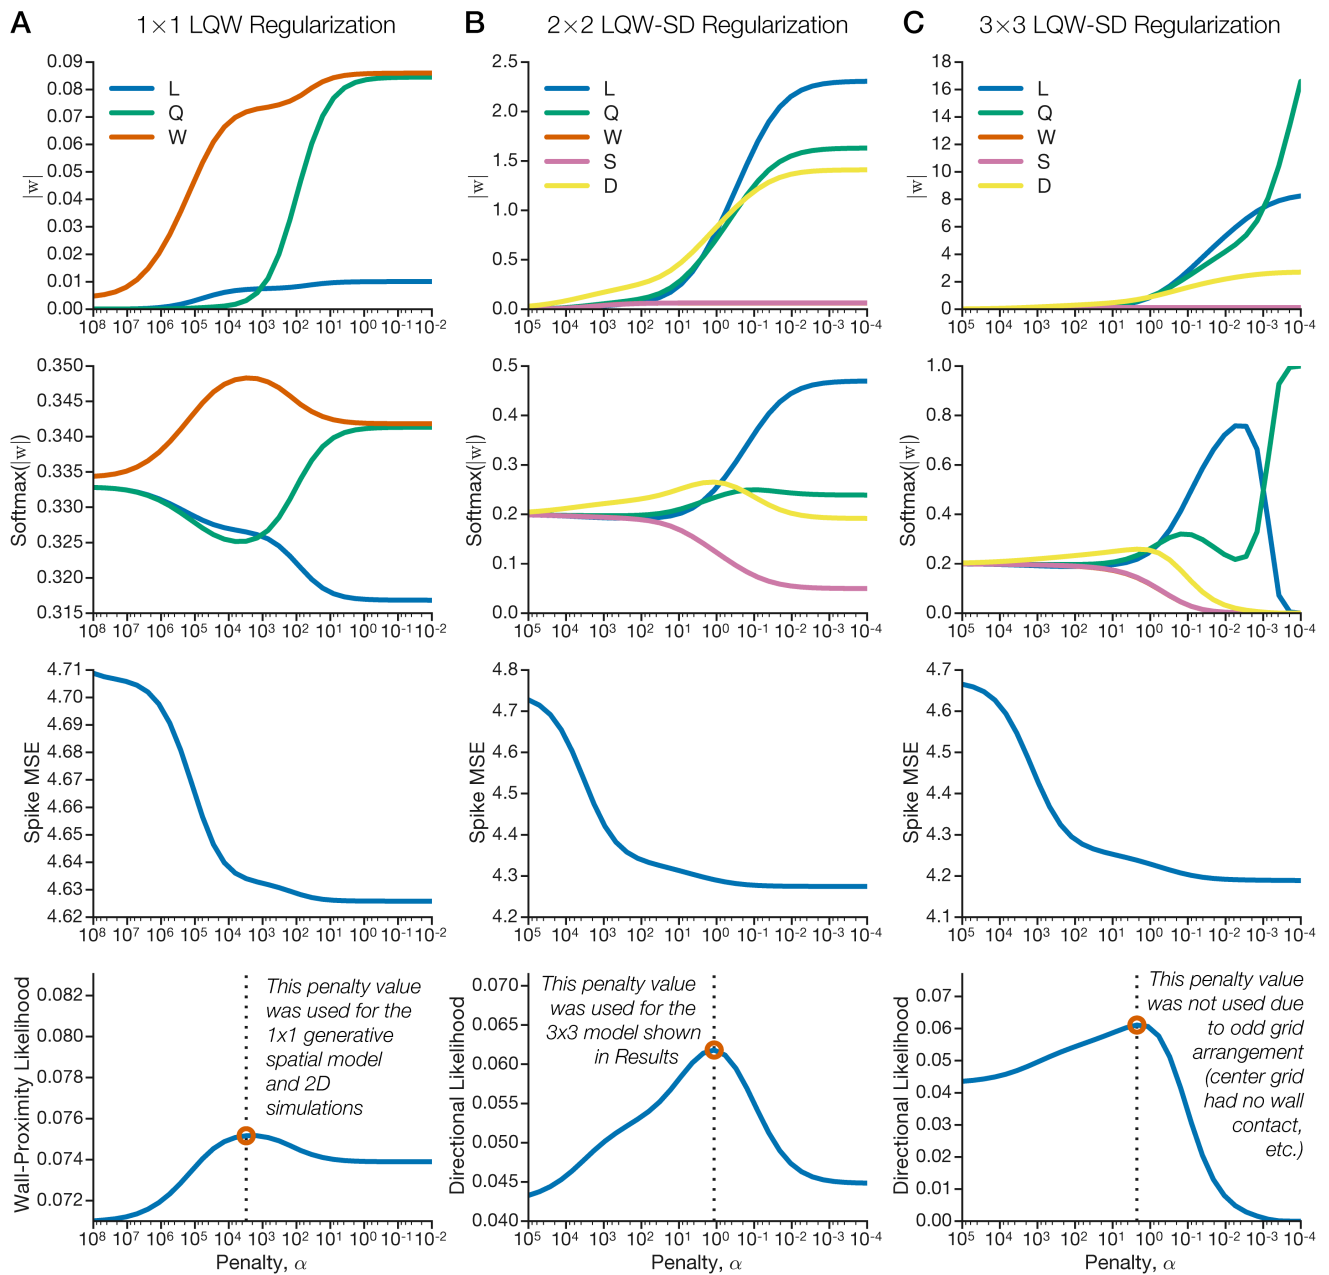

**S4 Fig.** See legend on reverse.

**S4 Fig. Regularization and shrinkage curves used for training GLM models.** We trained GLMs to predict spike counts in 300-ms intervals based on spatial ( $L$ ,  $Q$ ,  $W$ ) and/or trajectory-based ( $S$ ,  $D$ ) variables (Methods). For the analysis (Fig 5B+C; S4 Fig, the model was trained and tested on a  $3 \times 3$  spatial grid (C); however, the penalty parameter used for training was derived by optimizing the model on a  $2 \times 2$  grid (B). Both values were similar, but the  $2 \times 2$  value (B, bottom) was used because the directional likelihood was strongly peaked and the model better captured wall responses because the center grid of the  $3 \times 3$  model was isolated from the walls. The GLM that we used to generate spatial inputs for the realistic 2D open-field phaser simulations was trained only on the spatial variables (A,  $1 \times 1$  grid). (Top) Absolute model weights for each variable. (Second row) Softmax normalization of absolute model weights. (Third row) Spike-count prediction errors. (Last row) Model likelihood is the softmax  $W$  (A) or  $D$  (B+C) divided by the prediction error (Eq (14); Methods). The maximum likelihood  $\alpha$  parameter (red circle) was chosen as the  $\ell_2$ -regularization penalty for the ridge regressions.
